# Supplementary material for: Psychometric Analysis of the SPEED Questionnaire and CLDEQ-8
Source: PubMed Central journal article supplement — Invest Ophthalmol Vis Sci. 2018 Jul;59(8):3307–13. doi: 10.1167/iovs.18-24016 (PMC6733533; doi:10.1167/iovs.18-24016), 2018-07
Supplement: iovs-59-07-37_s01.pdf [file iovs-59-07-37_s01.pdf]

## Supplemental Figures

### Supplemental Figure 1: Standard Patient Evaluation of Eye Dryness (SPEED)\*

1. Report the type of **SYMPTOMS** you experience and when they occur:

| Symptoms                            | At this visit |    | Within past 72 hours |    | Within past 3 months |    |
|-------------------------------------|---------------|----|----------------------|----|----------------------|----|
|                                     | Yes           | No | Yes                  | No | Yes                  | No |
| Dryness, Grittiness or Scratchiness |               |    |                      |    |                      |    |
| Soreness or Irritation              |               |    |                      |    |                      |    |
| Burning or Watering                 |               |    |                      |    |                      |    |
| Eye Fatigue                         |               |    |                      |    |                      |    |

2. Report the **FREQUENCY** of your symptoms:

|                                     | 0 | 1 | 2 | 3 |
|-------------------------------------|---|---|---|---|
| Dryness, Grittiness or Scratchiness |   |   |   |   |
| Soreness or Irritation              |   |   |   |   |
| Burning or Watering                 |   |   |   |   |
| Eye Fatigue                         |   |   |   |   |

**Response Options:** 0 = Never; 1 = Sometimes; 2 = Often; 3 = Constant

3. Report the **SEVERITY** of your symptoms:

|                                     | 0 | 1 | 2 | 3 | 4 |
|-------------------------------------|---|---|---|---|---|
| Dryness, Grittiness or Scratchiness |   |   |   |   |   |
| Soreness or Irritation              |   |   |   |   |   |
| Burning or Watering                 |   |   |   |   |   |
| Eye Fatigue                         |   |   |   |   |   |

**Response Options:** 0 = No Problems; 1 = Tolerable - not perfect, but not uncomfortable; 2 = Uncomfortable - irritating, but does not interfere with my day; 3 = Bothersome - irritating and interferes with my day; 4 = Intolerable - unable to perform my daily tasks

\*Adapted from Korb DR, Herman JP, Greiner JV, et al. Lid wiper epitheliopathy and dry eye symptoms. *Eye Contact Lens* 2005;31:2-8.

**Supplemental Figure 2: Contact Lens Dry Eye Questionnaire-8 (CLDEQ-8)\***

1. Questions about **EYE DISCOMFORT**:

a. During a typical day in the past 2 weeks, **how often** did your eyes feel discomfort while wearing your contact lenses?

- 0 Never
- 1 Rarely
- 2 Sometimes
- 3 Frequently
- 4 Constantly

When your eyes felt discomfort with your contact lenses, **how intense was this feeling of discomfort...**

b. At the end of your wearing time?

|                |                |   |   |   |                |
|----------------|----------------|---|---|---|----------------|
| Never          | Not at All     |   |   |   | Very           |
| <u>Have it</u> | <u>Intense</u> |   |   |   | <u>Intense</u> |
| 0              | 1              | 2 | 3 | 4 | 5              |

2. Questions about **EYE DRYNESS**:

a. During a typical day in the past 2 weeks, **how often** did your eyes feel dry?

- 0 Never
- 1 Rarely
- 2 Sometimes
- 3 Frequently
- 4 Constantly

When your eyes felt dry, **how intense was this feeling of dryness...**

b. At the end of your wearing time?

|                |                |   |   |   |                |
|----------------|----------------|---|---|---|----------------|
| Never          | Not at All     |   |   |   | Very           |
| <u>Have it</u> | <u>Intense</u> |   |   |   | <u>Intense</u> |
| 0              | 1              | 2 | 3 | 4 | 5              |

3. Questions about **CHANGEABLE, BLURRY VISION:**

a. During a typical day in the past 2 weeks, **how often** did your vision change between clear and blurry or foggy while wearing your contact lenses?

- 0 Never
- 1 Rarely
- 2 Sometimes
- 3 Frequently
- 4 Constantly

When your vision was blurry, **how noticeable was the changeable, blurry, or foggy vision...**

b. At the end of your wearing time?

|                |                |   |   |   |                |
|----------------|----------------|---|---|---|----------------|
| Never          | Not at All     |   |   |   | Very           |
| <u>Have it</u> | <u>Intense</u> |   |   |   | <u>Intense</u> |
| 0              | 1              | 2 | 3 | 4 | 5              |

4. Questions about **CLOSING YOUR EYES:**

During a typical day in the past 2 weeks, **how often** did your eyes bother you so much that you wanted to close them?

- 0 Never
- 1 Rarely
- 2 Sometimes
- 3 Frequently
- 4 Constantly

5. Questions about **REMOVING YOUR LENSES:**

How often during the past 2 weeks, did your eyes *bother you so much* while wearing your contact lenses that you felt as if you needed to stop whatever you were doing and **take out your contact lenses**?

- 1 Never
- 2 Less than once a week
- 3 Weekly
- 4 Several times a week
- 5 Daily
- 6 Several times a day

\*Adapted from Chalmers RL, Begley CG, Moody K, Hickson-Curran SB. Contact Lens Dry Eye Questionnaire-8 (CLDEQ-8) and opinion of contact lens performance. *Optom Vis Sci* 2012;89:1435-1442.

**Supplemental Figure 3: 8-Item Standard Patient Evaluation of Eye Dryness (SPEED-8)\***

**1. Report the FREQUENCY of your symptoms:**

|                                     | 0 | 1 | 2 | 3 |
|-------------------------------------|---|---|---|---|
| Dryness, Grittiness or Scratchiness |   |   |   |   |
| Soreness or Irritation              |   |   |   |   |
| Burning or Watering                 |   |   |   |   |
| Eye Fatigue                         |   |   |   |   |

**Response Options:** 0 = Never; 1 = Sometimes; 2 = Often; 3 = Constant

**2. Report the SEVERITY of your symptoms:**

|                                     | 0 | 1 | 2 | 3 | 4 |
|-------------------------------------|---|---|---|---|---|
| Dryness, Grittiness or Scratchiness |   |   |   |   |   |
| Soreness or Irritation              |   |   |   |   |   |
| Burning or Watering                 |   |   |   |   |   |
| Eye Fatigue                         |   |   |   |   |   |

**Response Options:** 0 = No Problems; 1 = Tolerable - not perfect, but not uncomfortable; 2 = Uncomfortable - irritating, but does not interfere with my day; 3 = Bothersome - irritating and interferes with my day; 4 = Intolerable - unable to perform my daily tasks

\*Adapted from Korb DR, Herman JP, Greiner JV, et al. Lid wiper epitheliopathy and dry eye symptoms. *Eye Contact Lens* 2005;31:2-8.

**Supplemental Figure 4: 4-Item Contact Lens Dry Eye Questionnaire-8 (CLDEQ-4)\***

1. Questions about **EYE DISCOMFORT**:

a. During a typical day in the past 2 weeks, **how often** did your eyes feel discomfort while wearing your contact lenses?

- 0 Never
- 1 Rarely
- 2 Sometimes
- 3 Frequently
- 4 Constantly

When your eyes felt discomfort with your contact lenses, **how intense was this feeling of discomfort....**

b. At the end of your wearing time?

|                |                |   |   |   |                |
|----------------|----------------|---|---|---|----------------|
| Never          | Not at All     |   |   |   | Very           |
| <u>Have it</u> | <u>Intense</u> |   |   |   | <u>Intense</u> |
| 0              | 1              | 2 | 3 | 4 | 5              |

2. Questions about **EYE DRYNESS**:

a. During a typical day in the past 2 weeks, **how often** did your eyes feel dry?

- 0 Never
- 1 Rarely
- 2 Sometimes
- 3 Frequently
- 4 Constantly

When your eyes felt dry, **how intense was this feeling of dryness....**

b. At the end of your wearing time?

|                |                |   |   |   |                |
|----------------|----------------|---|---|---|----------------|
| Never          | Not at All     |   |   |   | Very           |
| <u>Have it</u> | <u>Intense</u> |   |   |   | <u>Intense</u> |
| 0              | 1              | 2 | 3 | 4 | 5              |

\*Adapted from Chalmers RL, Begley CG, Moody K, Hickson-Curran SB. Contact Lens Dry Eye Questionnaire-8 (CLDEQ-8) and opinion of contact lens performance. *Optom Vis Sci* 2012;89:1435-1442.
